# Supplementary material for: Topological isomers in lanthanide–chloranilate coordination polymers: synthesis, structure and CO2 adsorption properties
Source: Royal Society of Chemistry journal article supplement (doi:10.1039/d6ra02049f), 2026-05-22
Supplement: d6ra02049f1.pdf [file d6ra02049f1.pdf]

## Electronic supplementary information

### Topological isomers in lanthanide-chloranilate coordination polymers: synthesis, structure and CO<sub>2</sub> adsorption properties

Kenika Khotchasanthong,<sup>a</sup> Chombongkot Sricharoen,<sup>a</sup> Pacharapon Jearanaiwiwat,<sup>a</sup>  
Kunlanit Chinchana,<sup>a</sup> Sakchai Laksee,<sup>b</sup> Bunyarat Rungtaweeworanit,<sup>c</sup> Mongkol Sukwattanasinitt<sup>d</sup>  
and Kittipong Chainok<sup>\*a,e</sup>

<sup>a</sup>*Thammasat University Research Unit for Multifunctional Crystalline Materials and Applications, Faculty of Science and Technology, Thammasat University, Pathum Thani 12121, Thailand; e-mail: kc@tu.ac.th*

<sup>b</sup>*Thailand Institute of Nuclear Technology (Public Organization), Nakhon Nayok 26120, Thailand*

<sup>c</sup>*National Nanotechnology Center (NANOTEC), National Science and Technology Development Agency (NSTDA), Pathum Thani 12120, Thailand*

<sup>d</sup>*Department of Chemistry, Faculty of Science, Chulalongkorn University Bangkok 10330, Thailand*

<sup>e</sup>*Center of Excellence on Petrochemical and Materials Technology, Chulalongkorn University, Bangkok 10330, Thailand*

**Table S1**Lanthanide geometry analysis by SHAPE software for **1Ln** and **2Ln**

| Geometry | Enneagon<br>( $D_{9h}$ ) | Octagonal<br>pyramid<br>( $C_{8v}$ ) | Heptagonal<br>bipyramid<br>( $D_{7h}$ ) | Johnson<br>triangular<br>cupola<br>( $C_{3v}$ ) | Capped cube<br>( $C_{4v}$ ) |
|----------|--------------------------|--------------------------------------|-----------------------------------------|-------------------------------------------------|-----------------------------|
|          | EP-9                     | OPY-9                                | HBPY-9                                  | JTC-9                                           | JCCU-9                      |
| 1Pr      | 43.903                   | 33.050                               | 34.108                                  | 30.735                                          | <b>27.656</b>               |
| 1Nd      | 43.937                   | 33.115                               | 34.200                                  | 30.863                                          | <b>27.694</b>               |
| 2Sm      | 34.190                   | 32.735                               | 31.742                                  | <b>23.884</b>                                   | 31.158                      |
| 2Eu      | 34.383                   | 32.914                               | 31.865                                  | <b>24.064</b>                                   | 31.167                      |
| 2Gd      | 34.635                   | 33.139                               | 32.057                                  | <b>24.273</b>                                   | 31.183                      |
| 2Tb      | 34.860                   | 33.354                               | 32.187                                  | <b>24.468</b>                                   | 31.238                      |
| 2Dy      | 35.095                   | 33.546                               | 32.332                                  | <b>24.626</b>                                   | 31.259                      |
| 2Er      | 35.499                   | 33.989                               | 32.583                                  | <b>24.995</b>                                   | 31.315                      |
| 2Tm      | 35.633                   | 34.127                               | 32.676                                  | <b>25.158</b>                                   | 31.382                      |
| 2Yb      | 35.760                   | 34.277                               | 32.752                                  | <b>25.291</b>                                   | 31.455                      |

Lanthanide geometry analysis by SHAPE software for **3Ln**

| Geometry | Octagon ( $D_{8h}$ ) | Heptagonal<br>pyramid<br>( $C_{7v}$ ) | Hexagonal<br>bipyramid<br>( $D_{6h}$ ) | Cube<br>( $O_h$ ) | Square<br>antiprism<br>( $D_{4d}$ ) |
|----------|----------------------|---------------------------------------|----------------------------------------|-------------------|-------------------------------------|
|          | OP-8                 | HPY-8                                 | HBPY-8                                 | CU-8              | SAPR-8                              |
| 3Tm      | 42.881               | <b>37.264</b>                         | 40.062                                 | 43.604            | 41.535                              |
| 3Yb      | 42.943               | <b>37.389</b>                         | 40.157                                 | 43.685            | 41.590                              |

**Table S2** Selected bond lengths (Å) and bond angles (°) for **1Ln** and **2Ln**.

|                                         | <b>1Pr</b> | <b>1Nd</b> | <b>2Sm</b> | <b>2Eu</b> | <b>2Gd</b> |
|-----------------------------------------|------------|------------|------------|------------|------------|
| Ln1–O1                                  | 2.466(2)   | 2.451(3)   | 2.447(1)   | 2.435(2)   | 2.427(3)   |
| Ln1–O2 <sup>i</sup>                     | 2.500(2)   | 2.483(3)   | 2.456(1)   | 2.445(2)   | 2.439(3)   |
| Ln1–O3                                  | 2.501(2)   | 2.484(3)   | 2.422(2)   | 2.411(2)   | 2.407(3)   |
| Ln1–O4 <sup>ii</sup>                    | 2.507(2)   | 2.492(3)   | 2.471(2)   | 2.458(2)   | 2.455(3)   |
| Ln1–O5                                  | 2.506(2)   | 2.489(3)   | 2.466(1)   | 2.451(2)   | 2.439(3)   |
| Ln1–O6 <sup>iii</sup>                   | 2.529(2)   | 2.518(3)   | 2.545(2)   | 2.541(2)   | 2.537(3)   |
| Ln1–O7                                  | 2.574(2)   | 2.557(3)   | 2.421(2)   | 2.406(2)   | 2.390(3)   |
| Ln1–O8                                  | 2.480(3)   | 2.458(3)   | 2.502(2)   | 2.489(2)   | 2.477(4)   |
| Ln1–O9                                  | 2.541(3)   | 2.520(3)   | 2.442(2)   | 2.424(2)   | 2.393(4)   |
| O1–Ln1–O2 <sup>i</sup>                  | 63.88(7)   | 64.20(10)  | 64.78(5)   | 65.04(6)   | 65.26(10)  |
| O1–Ln1–O3                               | 141.67(8)  | 141.66(10) | 126.37(5)  | 126.77(7)  | 127.09(11) |
| O1–Ln1–O4 <sup>ii</sup>                 | 129.92(8)  | 129.91(11) | 72.25(5)   | 72.16(7)   | 72.13(10)  |
| O1–Ln1–O5                               | 92.45(7)   | 92.27(10)  | 138.05(5)  | 137.97(7)  | 138.06(11) |
| O1–Ln1–O6 <sup>iii</sup>                | 67.86(7)   | 67.90(10)  | 122.06(5)  | 121.94(7)  | 121.83(11) |
| O1–Ln1–O7                               | 72.60(8)   | 72.45(10)  | 71.57(5)   | 91.59(7)   | 71.56(11)  |
| O1–Ln1–O8                               | 78.39(9)   | 78.21(12)  | 125.82(5)  | 125.71(7)  | 125.61(11) |
| O2 <sup>i</sup> –Ln1–O3                 | 94.62(7)   | 94.59(10)  | 74.84(5)   | 74.93(7)   | 74.90(11)  |
| O2 <sup>i</sup> –Ln1–O4 <sup>ii</sup>   | 73.44(7)   | 73.27(10)  | 76.31(5)   | 76.37(7)   | 76.39(11)  |
| O2 <sup>i</sup> –Ln1–O5                 | 137.82(7)  | 137.78(10) | 144.93(5)  | 144.65(7)  | 144.46(11) |
| O2 <sup>i</sup> –Ln1–O6 <sup>iii</sup>  | 126.89(7)  | 127.08(10) | 136.13(5)  | 136.13(7)  | 136.13(11) |
| O2 <sup>i</sup> –Ln1–O7                 | 69.89(7)   | 69.75(10)  | 82.67(6)   | 83.07(8)   | 83.29(12)  |
| O3–Ln1–O4 <sup>ii</sup>                 | 63.07(7)   | 63.50(9)   | 64.83(5)   | 65.23(7)   | 65.57(11)  |
| O3–Ln1–O5                               | 83.13(7)   | 82.91(9)   | 95.00(5)   | 94.70(7)   | 94.31(11)  |
| O3–Ln1–O6 <sup>iii</sup>                | 138.05(7)  | 137.94(10) | 68.08(5)   | 68.07(7)   | 68.18(11)  |
| O3–Ln1–O7                               | 70.15(7)   | 70.19(9)   | 137.14(6)  | 137.32(8)  | 137.30(12) |
| O4 <sup>ii</sup> –Ln1–O6 <sup>iii</sup> | 128.68(7)  | 128.18(10) | 67.32(5)   | 67.37(6)   | 67.40(10)  |
| O4 <sup>ii</sup> –Ln1–O7                | 116.36(7)  | 116.55(10) | 143.24(5)  | 143.24(7)  | 143.20(11) |
| O5–Ln1–O4 <sup>ii</sup>                 | 137.60(7)  | 137.80(10) | 130.18(5)  | 130.38(6)  | 130.36(10) |
| O5–Ln1–O6 <sup>iii</sup>                | 62.81(7)   | 63.10(9)   | 130.18(5)  | 63.01(6)   | 62.98(10)  |
| O5–Ln1–O7                               | 69.82(7)   | 69.85(10)  | 82.89(5)   | 82.53(7)   | 82.53(12)  |
| O6 <sup>iii</sup> –Ln1–O7               | 114.95(7)  | 115.27(10) | 141.05(6)  | 140.66(8)  | 140.44(12) |
| O8–Ln1–O2 <sup>i</sup>                  | 78.88(10)  | 78.64(13)  | 73.76(5)   | 73.57(7)   | 73.44(11)  |
| O8–Ln1–O3                               | 130.86(8)  | 131.14(10) | 68.96(5)   | 68.97(7)   | 68.90(11)  |
| O8–Ln1–O4 <sup>ii</sup>                 | 68.49(8)   | 68.30(11)  | 129.81(5)  | 130.07(7)  | 130.26(11) |
| O8–Ln1–O5                               | 132.72(9)  | 132.97(12) | 71.29(5)   | 71.19(7)   | 71.10(11)  |
| O8–Ln1–O6 <sup>iii</sup>                | 70.92(8)   | 70.78(11)  | 111.89(5)  | 114.64(7)  | 112.37(11) |
| O8–Ln1–O7                               | 144.26(10) | 143.76(13) | 69.92(6)   | 69.92(8)   | 69.87(12)  |
| O9–Ln1–O1                               | 141.78(8)  | 141.75(12) | 69.49(5)   | 69.40(7)   | 69.33(11)  |
| O9–Ln1–O2 <sup>i</sup>                  | 147.38(9)  | 146.83(12) | 134.15(5)  | 134.34(7)  | 134.51(11) |
| O9–Ln1–O3                               | 72.44(9)   | 72.51(11)  | 140.41(6)  | 140.14(8)  | 139.96(12) |
| O9–Ln1–O4 <sup>ii</sup>                 | 74.02(9)   | 73.65(12)  | 93.20(6)   | 92.83(8)   | 92.49(13)  |
| O9–Ln1–O5                               | 71.72(9)   | 72.28(12)  | 73.84(6)   | 74.02(8)   | 74.28(12)  |
| O9–Ln1–O6 <sup>iii</sup>                | 74.00(9)   | 73.94(12)  | 73.17(6)   | 72.87(8)   | 72.56(12)  |
| O9–Ln1–O7                               | 128.49(9)  | 129.07(11) | 80.18(6)   | 80.12(9)   | 80.23(13)  |
| O9–Ln1–O8                               | 87.25(11)  | 87.17(14)  | 136.12(6)  | 136.26(8)  | 136.42(13) |

Table S2 (Continued).

|                                         | <b>2Tb</b> | <b>2Dy</b> | <b>2Er</b> | <b>2Tm</b> | <b>2Yb</b> |
|-----------------------------------------|------------|------------|------------|------------|------------|
| Ln1-O1                                  | 2.419(2)   | 2.412(2)   | 2.394(2)   | 2.389(2)   | 2.417(2)   |
| Ln1-O2 <sup>i</sup>                     | 2.417(2)   | 2.410(3)   | 2.390(2)   | 2.376(2)   | 2.356(1)   |
| Ln1-O3                                  | 2.385(2)   | 2.373(3)   | 2.350(2)   | 2.340(2)   | 2.336(2)   |
| Ln1-O4 <sup>ii</sup>                    | 2.431(2)   | 2.424(3)   | 2.396(2)   | 2.385(2)   | 2.413(2)   |
| Ln1-O5                                  | 2.423(2)   | 2.417(3)   | 2.385(2)   | 2.374(2)   | 2.374(2)   |
| Ln1-O6 <sup>iii</sup>                   | 2.528(2)   | 2.530(3)   | 2.519(2)   | 2.523(2)   | 2.584(2)   |
| Ln1-O7                                  | 2.377(2)   | 2.367(3)   | 2.337(2)   | 2.327(2)   | 2.373(2)   |
| Ln1-O8                                  | 2.468(2)   | 2.461(3)   | 2.439(2)   | 2.436(2)   | 2.439(2)   |
| Ln1-O9                                  | 2.372(2)   | 2.356(3)   | 2.316(3)   | 2.304(2)   | 2.261(2)   |
| O1-Ln1-O2 <sup>i</sup>                  | 65.53(6)   | 65.70(8)   | 66.29(7)   | 66.43(6)   | 65.32(5)   |
| O1-Ln1-O3                               | 127.58(7)  | 127.88(9)  | 128.90(8)  | 129.21(7)  | 130.08(5)  |
| O1-Ln1-O4 <sup>ii</sup>                 | 72.00(7)   | 71.77(9)   | 71.87(7)   | 71.75(7)   | 72.55(5)   |
| O1-Ln1-O8                               | 137.90(7)  | 125.40(9)  | 125.08(8)  | 125.03(7)  | 124.17(5)  |
| O2 <sup>i</sup> -Ln1-O4 <sup>ii</sup>   | 121.51(7)  | 76.36(9)   | 76.38(8)   | 76.36(7)   | 77.38(5)   |
| O2 <sup>i</sup> -Ln1-O8                 | 71.46(7)   | 73.15(9)   | 72.63(8)   | 72.60(7)   | 73.30(5)   |
| O3-Ln1-O2 <sup>i</sup>                  | 125.47(7)  | 75.38(9)   | 75.48(8)   | 75.69(7)   | 77.97(5)   |
| O3-Ln1-O4 <sup>ii</sup>                 | 75.15(7)   | 66.24(9)   | 67.02(7)   | 67.27(7)   | 67.14(5)   |
| O3-Ln1-O8                               | 76.30(7)   | 69.24(9)   | 68.92(8)   | 69.05(7)   | 70.59(5)   |
| O4 <sup>ii</sup> -Ln1-O8                | 144.24(7)  | 130.80(9)  | 130.91(8)  | 131.13(7)  | 132.39(5)  |
| O5-Ln1-O1                               | 135.99(7)  | 137.89(9)  | 137.60(8)  | 137.76(7)  | 138.45(5)  |
| O5-Ln1-O2 <sup>i</sup>                  | 83.46(8)   | 144.04(9)  | 143.61(8)  | 143.45(7)  | 143.23(5)  |
| O5-Ln1-O3                               | 65.90(7)   | 93.67(9)   | 93.00(8)   | 92.51(7)   | 90.95(6)   |
| O5-Ln1-O4 <sup>ii</sup>                 | 93.98(7)   | 130.87(9)  | 131.13(7)  | 131.15(7)  | 130.38(5)  |
| O5-Ln1-O6 <sup>iii</sup>                | 67.99(7)   | 63.58(8)   | 63.76(7)   | 63.96(6)   | 64.33(5)   |
| O5-Ln1-O7                               | 137.49(8)  | 82.24(10)  | 81.69(8)   | 81.68(7)   | 82.29(6)   |
| O5-Ln1-O8                               | 67.35(6)   | 70.95(9)   | 71.02(8)   | 70.87(7)   | 69.95(5)   |
| O6 <sup>iii</sup> -Ln1-O1               | 142.99(7)  | 121.20(9)  | 121.09(8)  | 120.70(7)  | 121.47(5)  |
| O6 <sup>iii</sup> -Ln1-O2 <sup>i</sup>  | 130.68(6)  | 136.00(9)  | 135.94(8)  | 135.84(7)  | 135.87(5)  |
| O6 <sup>iii</sup> -Ln1-O3               | 63.35(6)   | 67.91(9)   | 67.94(8)   | 67.89(7)   | 65.80(5)   |
| O6 <sup>iii</sup> -Ln1-O4 <sup>ii</sup> | 82.36(7)   | 67.30(8)   | 67.39(7)   | 67.22(6)   | 66.09(5)   |
| O6 <sup>iii</sup> -Ln1-O8               | 140.44(8)  | 113.25(9)  | 113.71(8)  | 114.15(7)  | 114.26(5)  |
| O7-Ln1-O1                               | 73.29(7)   | 71.60(9)   | 71.45(8)   | 71.49(7)   | 70.91(6)   |
| O7-Ln1-O2 <sup>i</sup>                  | 69.09(7)   | 83.45(10)  | 84.21(9)   | 84.45(8)   | 83.33(6)   |
| O7-Ln1-O3                               | 130.51(7)  | 137.46(10) | 137.58(9)  | 137.75(8)  | 138.41(6)  |
| O7-Ln1-O4 <sup>ii</sup>                 | 71.02(7)   | 142.89(9)  | 142.92(8)  | 142.88(7)  | 143.15(6)  |
| O7-Ln1-O6 <sup>iii</sup>                | 112.85(7)  | 140.45(10) | 139.76(9)  | 139.64(8)  | 140.74(6)  |
| O7-Ln1-O8                               | 69.73(7)   | 69.46(10)  | 69.59(8)   | 69.53(8)   | 68.54(6)   |
| O9-Ln1-O1                               | 69.03(7)   | 69.02(9)   | 68.62(8)   | 68.51(7)   | 68.64(6)   |
| O9-Ln1-O2 <sup>i</sup>                  | 134.50(7)  | 134.67(9)  | 134.89(8)  | 134.93(7)  | 133.95(6)  |
| O9-Ln1-O3                               | 139.66(8)  | 139.29(10) | 138.76(9)  | 138.44(8)  | 136.86(6)  |
| O9-Ln1-O4 <sup>ii</sup>                 | 92.21(8)   | 91.92(10)  | 91.05(9)   | 90.77(8)   | 89.80(7)   |
| O9-Ln1-O5                               | 74.55(7)   | 74.64(10)  | 75.21(9)   | 75.52(8)   | 76.57(6)   |
| O9-Ln1-O6 <sup>iii</sup>                | 72.40(8)   | 72.06(10)  | 71.47(8)   | 71.16(8)   | 71.64(6)   |
| O9-Ln1-O7                               | 80.22(9)   | 80.49(11)  | 80.61(10)  | 80.62(9)   | 81.36(7)   |
| O9-Ln1-O8                               | 136.54(8)  | 136.57(11) | 137.39(9)  | 137.48(8)  | 137.15(7)  |

Symmetry codes: **(1Ln)** (i)  $-x+1, -y+1, -z$ ; (ii)  $-x+1, -y+2, -z+1$ ; (iii)  $-x, -y+1, -z+1$ ; (iv)  $x, y+1, z$ .  
**(2Ln)** (i)  $-x+1, -y+1, -z+2$ ; (ii)  $-x+2, -y, -z+2$ ; (iii)  $-x+2, -y, -z+1$ .

**Table S3** Selected bond lengths (Å) and bond angles (°) for **3Ln**.

|                                         | <b>3Tm</b> | <b>3Yb</b> |
|-----------------------------------------|------------|------------|
| Ln1–O1                                  | 2.357(2)   | 2.349(2)   |
| Ln1–O2 <sup>i</sup>                     | 2.356(2)   | 2.352(2)   |
| Ln1–O3                                  | 2.324(2)   | 2.309(2)   |
| Ln1–O4 <sup>ii</sup>                    | 2.363(2)   | 2.353(2)   |
| Ln1–O5                                  | 2.333(2)   | 2.317(2)   |
| Ln1–O6 <sup>iii</sup>                   | 2.385(2)   | 2.375(2)   |
| Ln1–O7                                  | 2.275(3)   | 2.260(3)   |
| Ln1–O8                                  | 2.257(3)   | 2.247(3)   |
| O1–Ln1–O2 <sup>i</sup>                  | 66.74(8)   | 66.99(8)   |
| O1–Ln1–O3                               | 74.40(8)   | 74.44(8)   |
| O1–Ln1–O4 <sup>ii</sup>                 | 126.86(8)  | 127.18(8)  |
| O1–Ln1–O8                               | 141.18(9)  | 141.22(9)  |
| O2 <sup>i</sup> –Ln1–O4 <sup>ii</sup>   | 129.83(8)  | 130.01(8)  |
| O2 <sup>i</sup> –Ln1–O8                 | 74.45(9)   | 74.24(9)   |
| O3–Ln1–O2 <sup>i</sup>                  | 74.21(8)   | 74.07(8)   |
| O3–Ln1–O4 <sup>ii</sup>                 | 66.92(8)   | 67.46(7)   |
| O3–Ln1–O8                               | 94.55(10)  | 94.54(10)  |
| O4 <sup>ii</sup> –Ln1–O8                | 78.22(9)   | 78.18(9)   |
| O5–Ln1–O1                               | 79.39(8)   | 79.15(8)   |
| O5–Ln1–O2 <sup>i</sup>                  | 78.50(8)   | 78.37(8)   |
| O5–Ln1–O3                               | 147.82(8)  | 147.48(8)  |
| O5–Ln1–O4 <sup>ii</sup>                 | 145.26(8)  | 145.06(8)  |
| O5–Ln1–O6 <sup>iii</sup>                | 67.08(7)   | 67.42(7)   |
| O5–Ln1–O7                               | 91.37(10)  | 91.45(10)  |
| O5–Ln1–O8                               | 94.28(10)  | 94.29(10)  |
| O6 <sup>iii</sup> –Ln1–O1               | 131.94(8)  | 131.81(8)  |
| O6 <sup>iii</sup> –Ln1–O2 <sup>i</sup>  | 132.78(8)  | 132.90(8)  |
| O6 <sup>iii</sup> –Ln1–O3               | 145.10(8)  | 145.10(7)  |
| O6 <sup>iii</sup> –Ln1–O4 <sup>ii</sup> | 78.19(7)   | 77.65(7)   |
| O6 <sup>iii</sup> –Ln1–O8               | 76.89(9)   | 77.01(10)  |
| O7–Ln1–O1                               | 73.50(9)   | 73.28(9)   |
| O7–Ln1–O2 <sup>i</sup>                  | 140.10(9)  | 140.15(9)  |
| O7–Ln1–O3                               | 98.66(10)  | 98.69(10)  |
| O7–Ln1–O4 <sup>ii</sup>                 | 77.77(10)  | 77.74(9)   |
| O7–Ln1–O6 <sup>iii</sup>                | 73.94(9)   | 73.92(10)  |
| O7–Ln1–O8                               | 145.29(10) | 145.46(10) |

Symmetry codes: (i)  $-x+1, -y+1, -z+2$ ; (ii)  $-x+2, -y+1, -z+2$ ; (iii)  $-x+1, -y+1, -z+1$ .

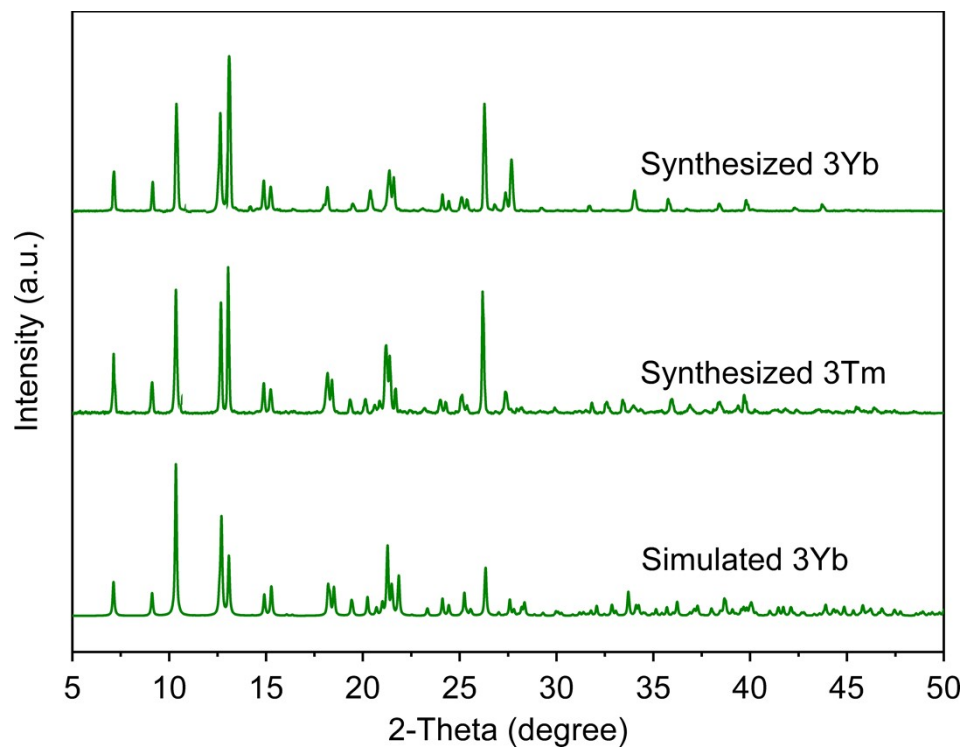

**Fig. S1** Comparison of the simulated and synthesized PXRD patterns of all compounds in the series **3Ln**.

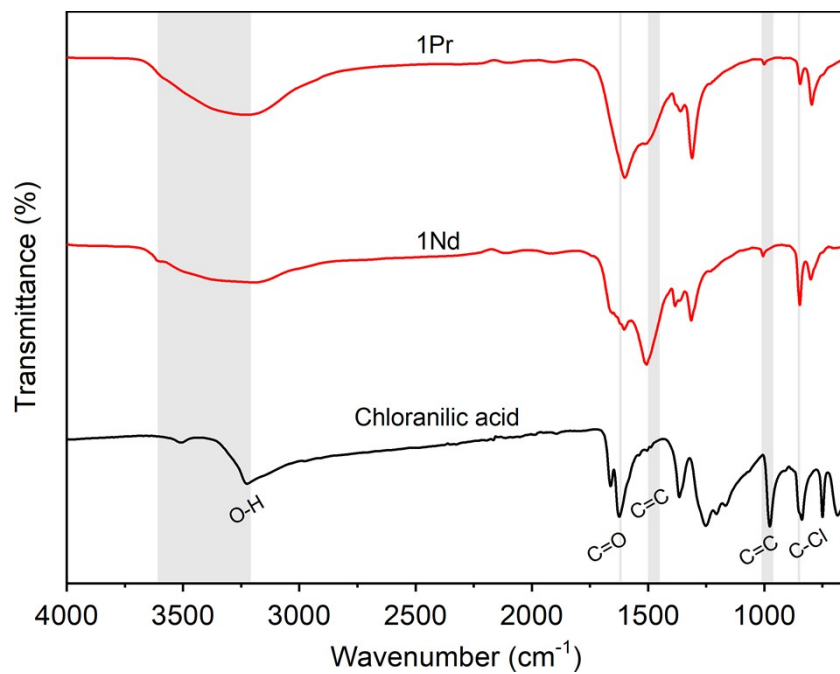

(a)

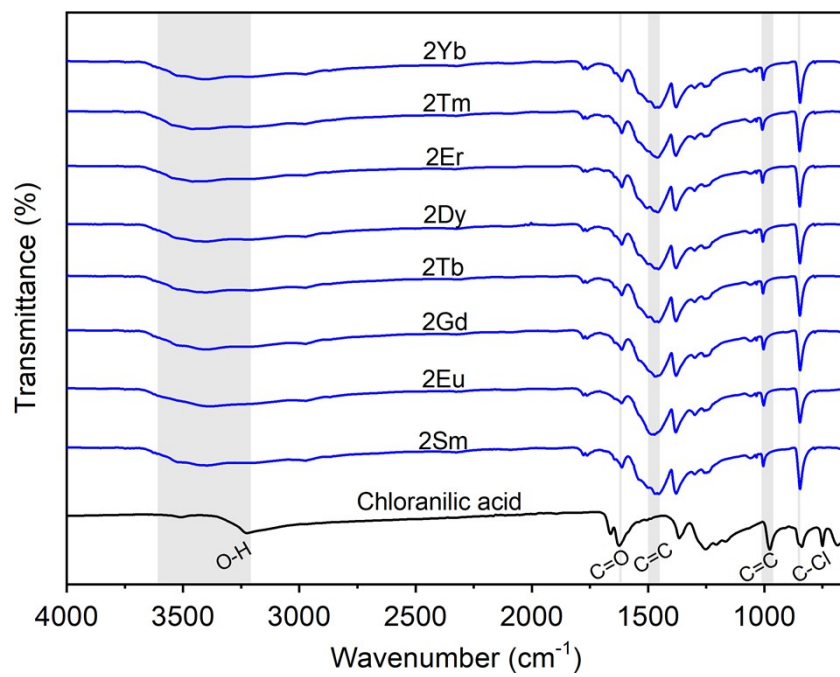

(b)

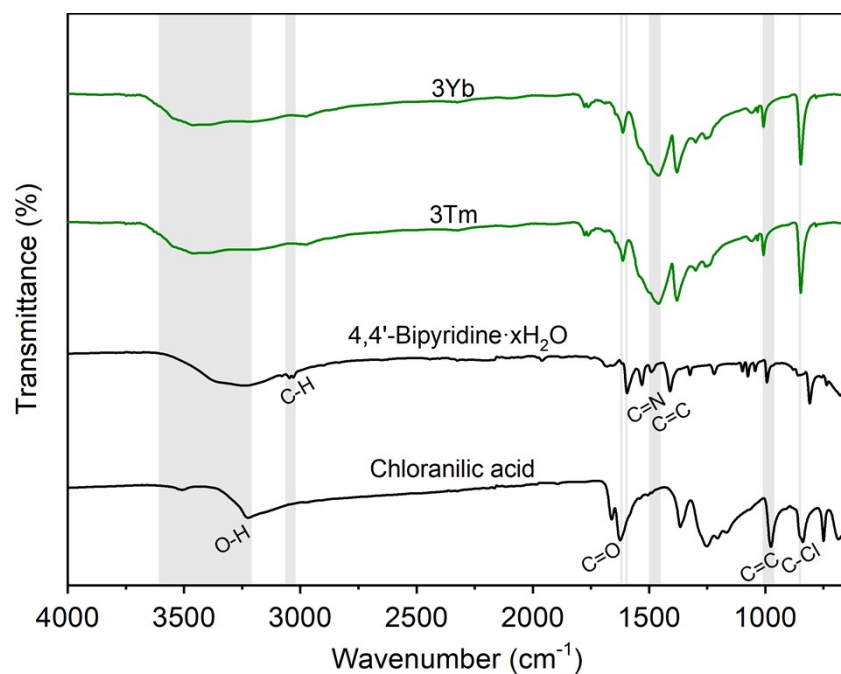

(c)

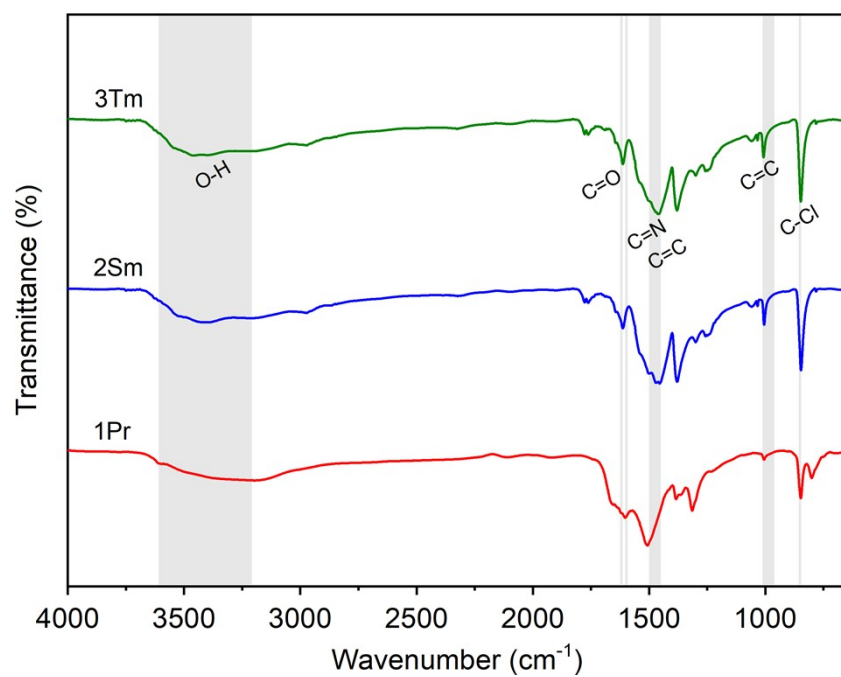

(d)

**Fig. S2** FT-IR spectra recorded at room temperature for (a) chloranilic acid and **1Ln** compounds, (b) chloranilic acid and **2Ln** compounds, (c) chloranilic acid, 4,4'-bipyridine·xH<sub>2</sub>O, and **3Ln** compounds, and (d) a comparative analysis of **1Pr**, **2Sm**, and **3Tm**.

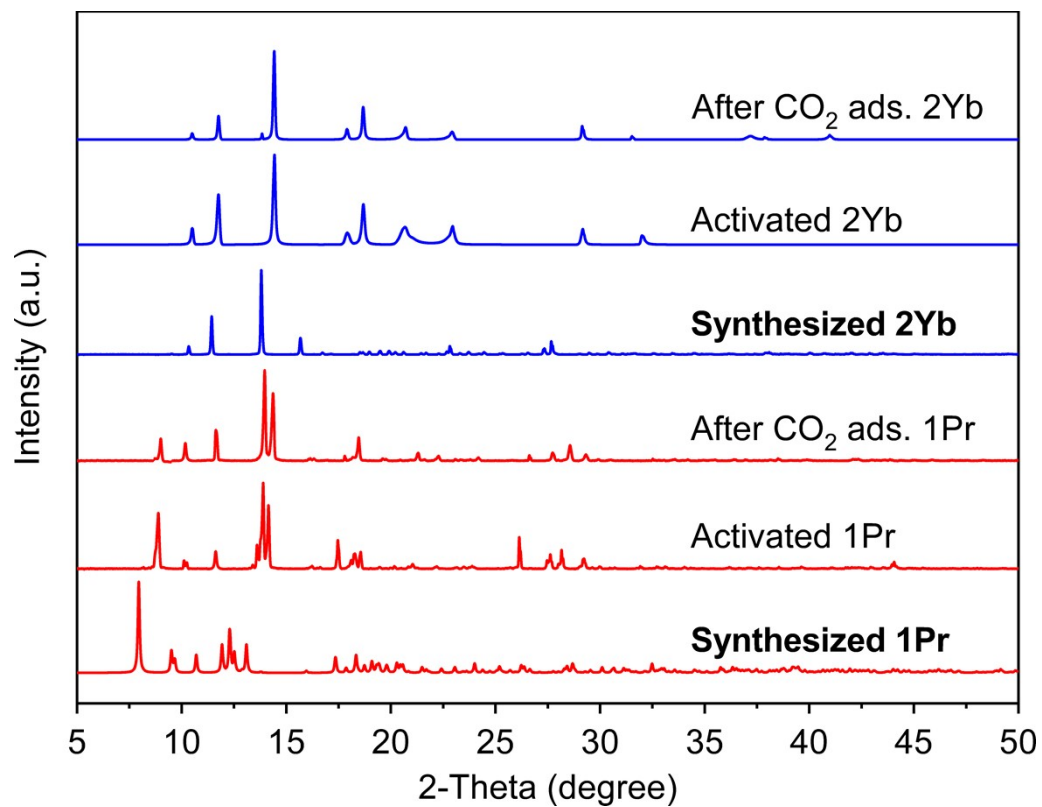

**Fig. S3** Comparison of as-synthesized, thermally activated, and after CO<sub>2</sub> sorption PXR D patterns at an ambient temperature of **1Pr** and **2Yb**.
